# Supplementary material
Source: Springer Nature journal article supplement (https://www.springermedizin.de/resource/supplementary/12902_2010_115_MOESM5_ESM.pdf/9515526)

Adiponectin vs. Waist Circumference, classified by ethnicity

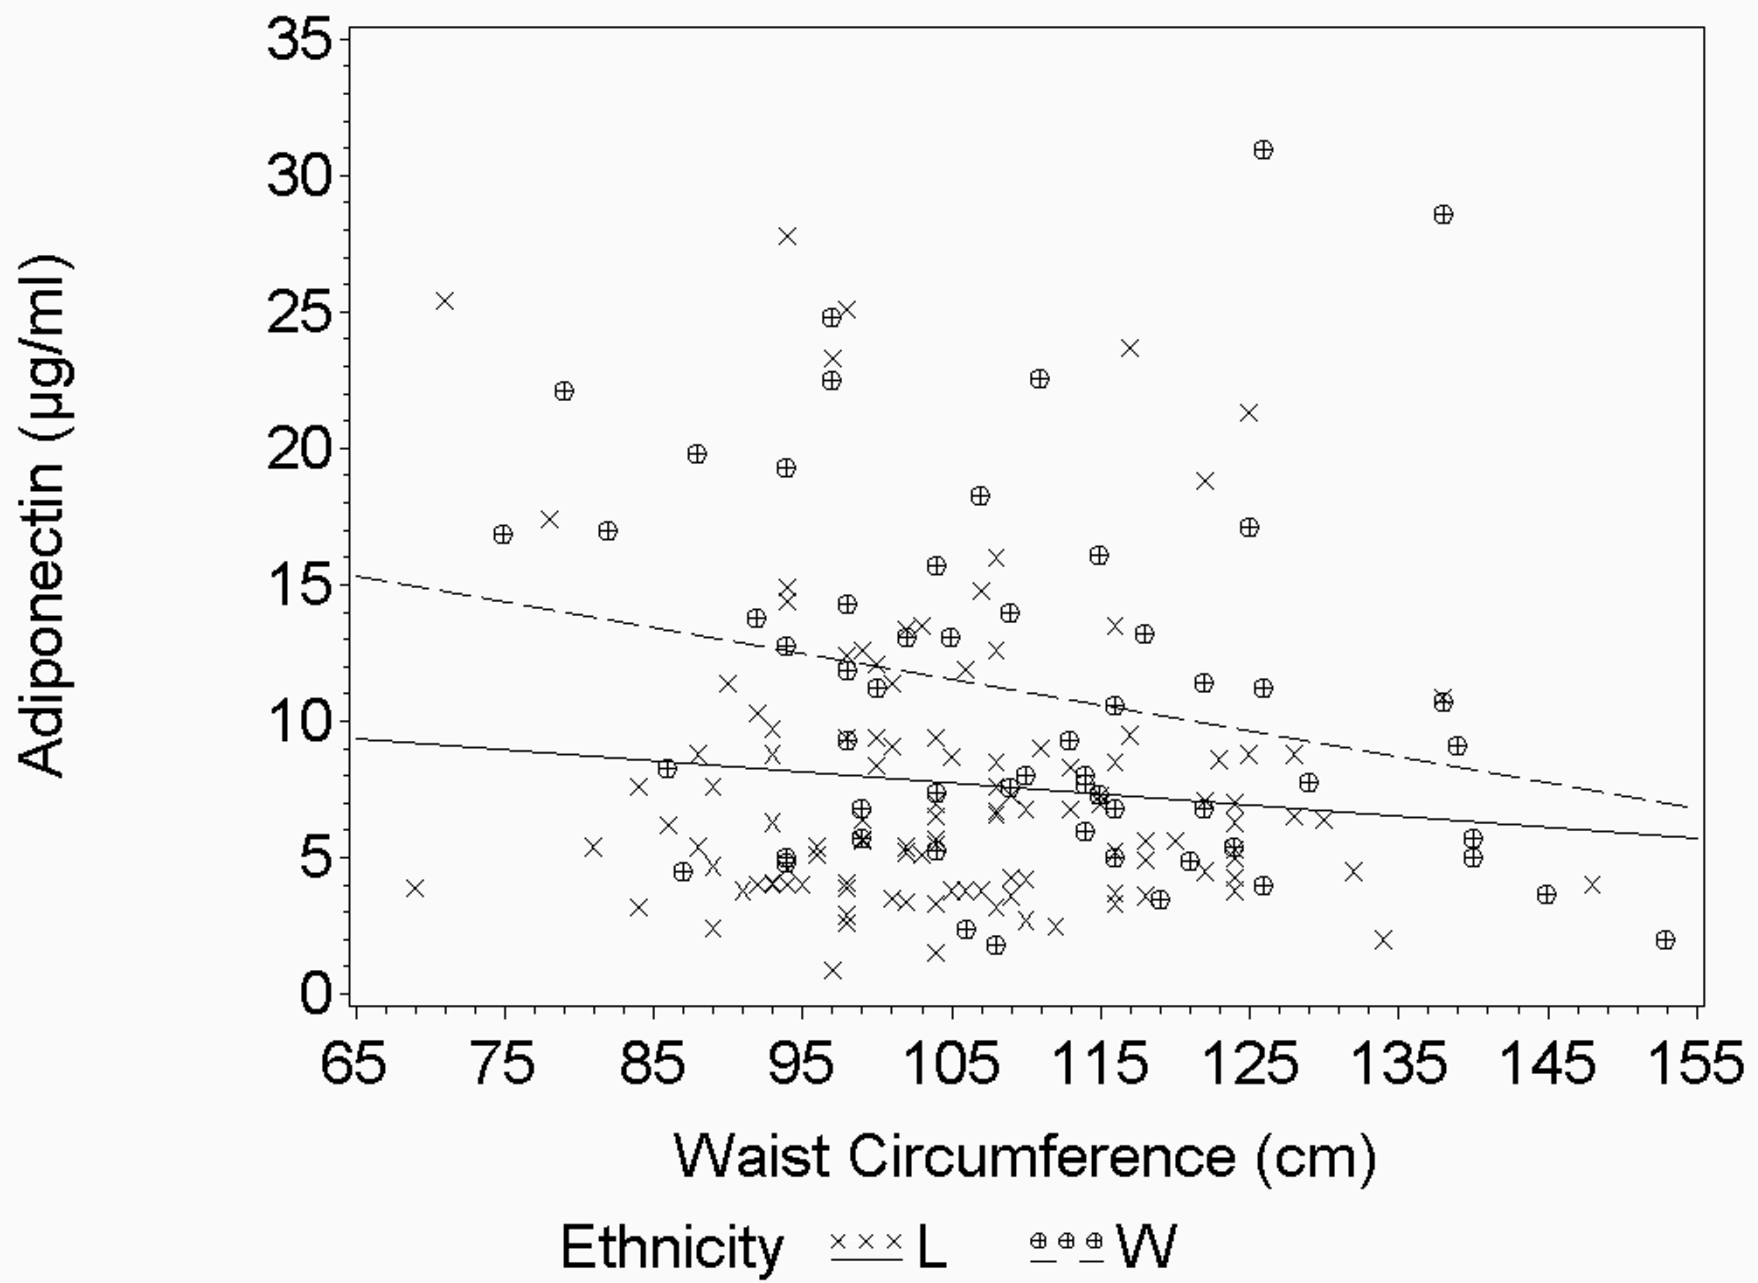

Supplement: MOESM5 [file 9515526]
